# Supplementary material
Source: PubMed Central journal article supplement (PMC3409933)
Supplement: NIHMS375682-supplement-Supplemental_Table_1.pdf [file NIHMS375682-supplement-Supplemental_Table_1.pdf]

**Supplemental Table 1**

Antibody information and dilution used in this study.

| Antibody                                                    | Vender                         | Clone   | Dilution                                                                |
|-------------------------------------------------------------|--------------------------------|---------|-------------------------------------------------------------------------|
| FITC-conjugated rat anti-mouse CD45 IgG2b, $\kappa$         | BD Pharmingen                  | 30-F11  | 1 $\mu$ L to $1 \times 10^6$ cell (MACS)<br>1:100 in FACS buffer (FACS) |
| PE-conjugated rat anti-mouse PDGFR- $\beta$ IgG2a, $\kappa$ | eBioscience                    | APB5    | 5 $\mu$ L to $1 \times 10^6$ cell (MACS)<br>1:20 in FACS buffer (FACS)  |
| PE-conjugated rat anti-mouse CD11b IgG2a, $\kappa$          | BD Pharmingen                  | M1/70   | 1:100 in FACS buffer (FACS)                                             |
| FITC-conjugated rat anti-mouse CD34 IgG2a, $\kappa$         | eBioscience                    | RAM34   | 1:50 in FACS buffer (FACS)                                              |
| PE-conjugated rat anti-mouse CD31 IgG2a, $\kappa$           | eBioscience                    | 390     | 1:50 in FACS buffer (FACS)                                              |
| FITC-conjugated rat anti-mouse CD146 IgG2a, $\kappa$        | BioLegend                      | ME-9F1  | 1:50 in FACS buffer (FACS)                                              |
| PE-conjugated mouse anti-mouse/rat CD90.1 IgG2a, $\kappa$   | eBioscience                    | HIS51   | 1:50 in FACS buffer (FACS)                                              |
| PE-conjugated rat anti-mouse Sca-1 IgG2a, $\kappa$          | eBioscience                    | D7      | 1:100 in FACS buffer (FACS)                                             |
| PE-conjugated rat anti-mouse CD29 IgG2a, $\kappa$           | eBioscience                    | HMb1-1  | 1:100 in FACS buffer (FACS)                                             |
| PE-conjugated rat anti-mouse CD44 IgG2b, $\kappa$           | eBioscience                    | IM7     | 1:100 in FACS buffer (FACS)                                             |
| FITC Rat IgG2a isotype control                              | eBioscience                    | -       | 1:100 in FACS buffer (FACS)                                             |
| FITC Rat IgG2b isotype control                              | eBioscience                    | -       | 1:100 in FACS buffer (FACS)                                             |
| PE Rat IgG2a isotype control                                | eBioscience                    | -       | 1:100 in FACS buffer (FACS)                                             |
| PE Rat IgG2b isotype control                                | eBioscience                    | -       | 1:100 in FACS buffer (FACS)                                             |
| Mouse anti-Vimentin                                         | abcam                          | Vim 3B4 | 1:200 in 1.5% BSA (IF)                                                  |
| Mouse anti- $\alpha$ SMA                                    | Sigma                          | 1A10    | 1:200 in 1.5% BSA (IF)<br>1:200 in 5% horse serum (IHF)                 |
| Rabbit anti-smMHC                                           | Biomedical<br>Technology, Inc. | BT-562  | 1:200 in 5% goat serum (IF)                                             |
| Mouse anti-human CD31                                       | Dako                           | JC70A   | 1:50 in 5% horse serum (IHF)                                            |
| Texas Red-conjugated horse anti-mouse IgG                   | Vector Laboratories            | TI-2000 | 1:200 in 1.5% BSA (IF)<br>1:200 in 5% horse serum (IHF)                 |
| Texas Red-conjugated goat anti-rabbit IgG                   | Vector Laboratories            | TI-1000 | 1:200 in 1.5% BSA (IF)                                                  |
| FITC-conjugated goat anti-rabbit IgG                        | Vector Laboratories            | FI-5000 | 1:200 in 5% horse serum (IHF)                                           |

MACS: Magnetic-activated cell sorting; FACS: flow cytometry; IF: immunofluorescent cell staining; IHF: immunofluorescent staining of paraffin-embedded section
